# Supplementary material
Source: PubMed Central journal article supplement (PMC3584452)
Supplement: NIHMS435702-supplement-1.pdf [file NIHMS435702-supplement-1.pdf]

**Phosphosulindac (OXT-328) inhibits the growth of human lung cancer xenografts in mice: Enhanced efficacy and mitochondria targeting by its formulation in solid lipid nanoparticles**

**Supplemental figures**

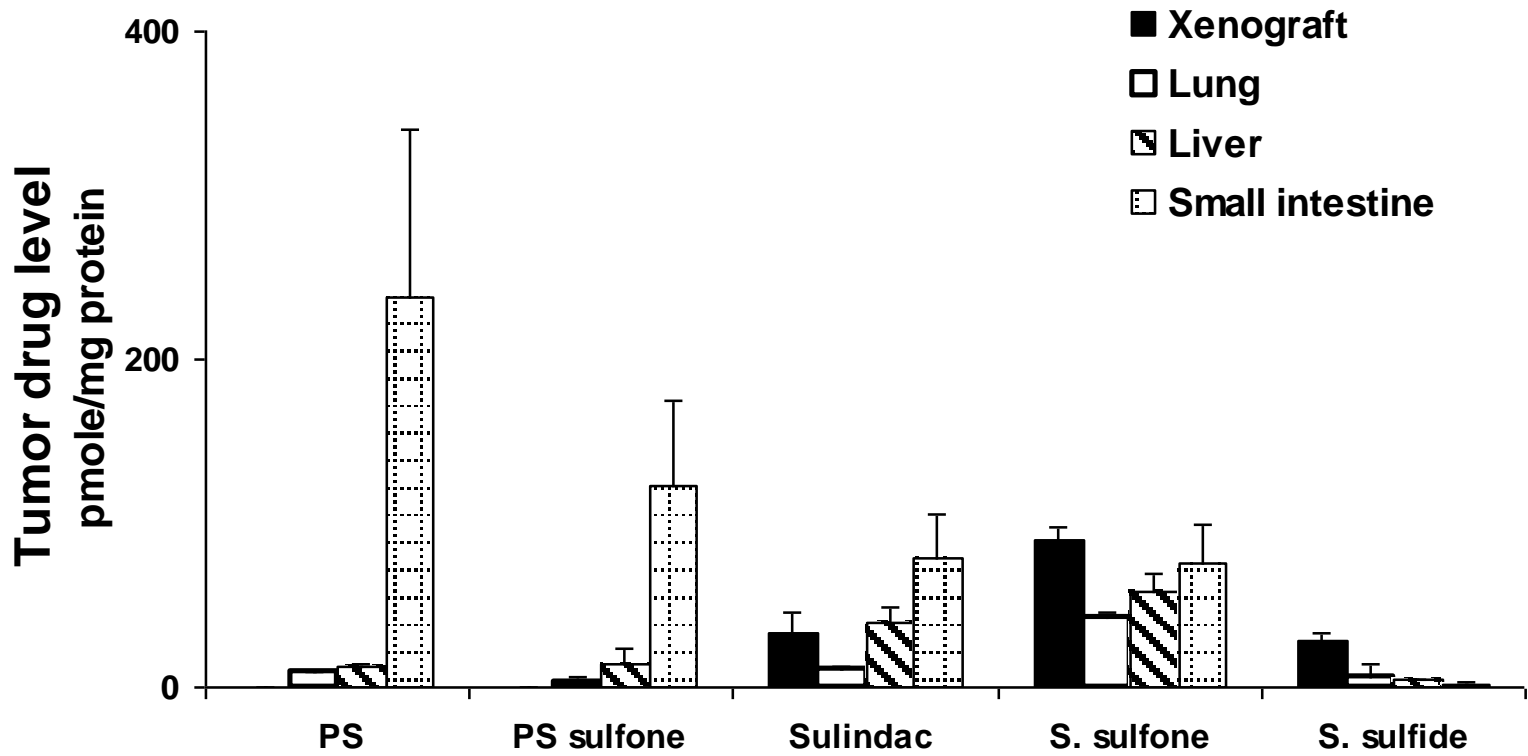

Suppl.Fig.1 Drug level of PS and its metabolites in four organs after treated with PS via po.

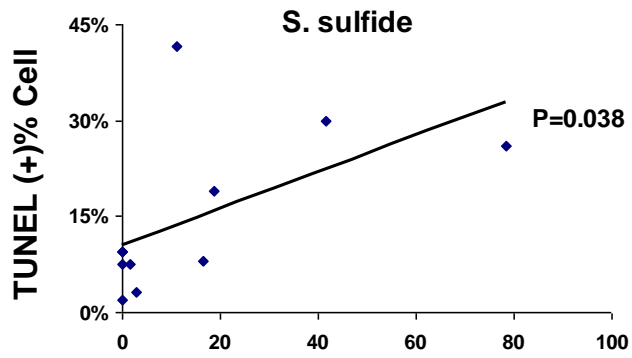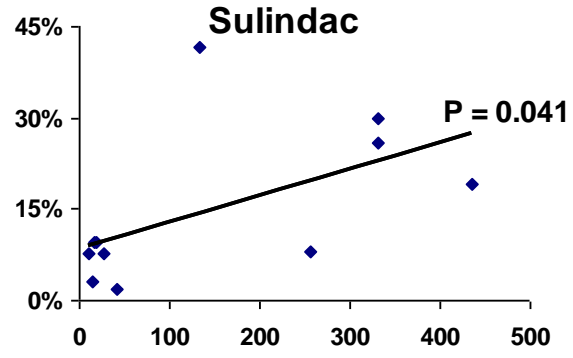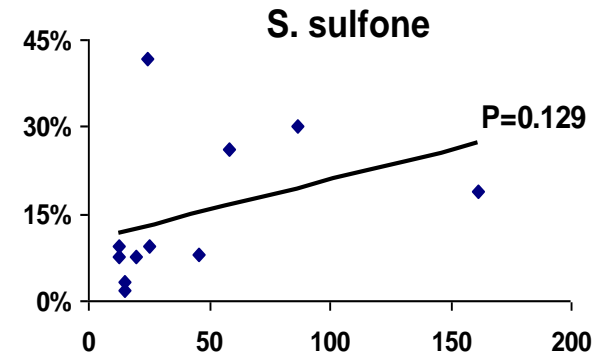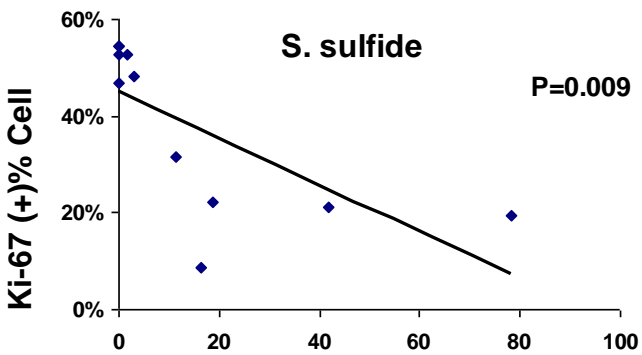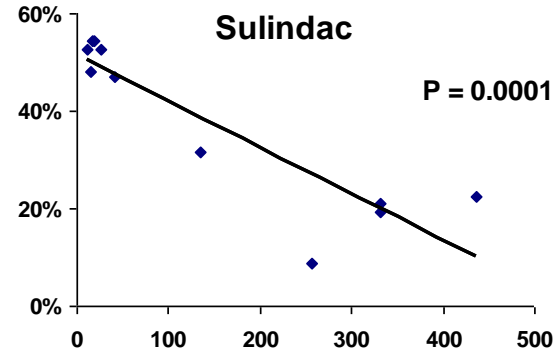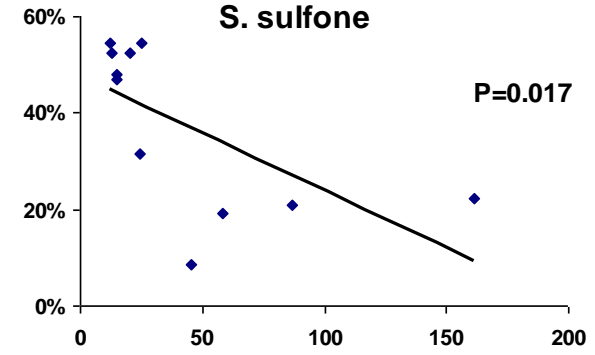

Drug level, pmole/mg protein

Suppl.Fig.2 Correlation between tumor drug level and Ki-67 or TUNEL positive cell ratio.
